# Supplementary material
Source: PubMed Central journal article supplement (PMC2954529)
Supplement: ja105852y_si_001.pdf [file ja105852y_si_001.pdf]

# Supplementary Information

## Protein Flexibility and Conformational Entropy in Ligand Design Targeting the Carbohydrate Recognition Domain of Galectin-3

*Carl Diehl<sup>1</sup>, Olof Engström<sup>1,6</sup>, Tamara Delaine<sup>2,7</sup>, Maria Håkansson<sup>3</sup>, Samuel Genheden<sup>4</sup>, Kristofer Modig<sup>1</sup>, Hakon Leffler<sup>5</sup>, Ulf Ryde<sup>4</sup>, Ulf J. Nilsson<sup>2</sup>, Mikael Akke<sup>1,\*</sup>*

<sup>1</sup> Center for Molecular Protein Science, Biophysical Chemistry, Lund University, POBox 124, SE-22100 Lund, Sweden

<sup>2</sup> Organic Chemistry, Lund University, POBox 124, SE-22100 Lund, Sweden

<sup>3</sup> SARomics Biostructures AB, POBox 724, SE-22007 Lund, Sweden

<sup>4</sup> Theoretical Chemistry, Lund University, POBox 124, SE-22100 Lund, Sweden

<sup>5</sup> Section MIG, Department of Laboratory Medicine, Lund University, Sölvegatan 23, SE-22362 Lund, Sweden

<sup>6</sup> Present address: Department of Organic Chemistry, Arrhenius Laboratory, Stockholm University, SE-10691 Stockholm, Sweden

<sup>7</sup> Present address: Dermatochemistry and Skin Allergy, Department of Chemistry, University of Gothenburg, SE-41296 Gothenburg, Sweden.

Corresponding author e-mail: [mikael.akke@bpc.lu.se](mailto:mikael.akke@bpc.lu.se)

**Table S1.** Summary of quality statistics for the crystal structure of the L2-Gal3 complex.

|                                                 |                                               |
|-------------------------------------------------|-----------------------------------------------|
| Space group                                     | P2 <sub>1</sub> 2 <sub>1</sub> 2 <sub>1</sub> |
| Resolution (Å)                                  | 25.00 – 1.20 (1.23 – 1.20)                    |
| Wavelength (Å)                                  | 0.90778                                       |
| Unit cell (Å)                                   | a =35.80, b = 57.69, c = 62.41                |
| Completeness (%)                                | 99.6 (96.9)                                   |
| No. of observed reflections                     | 274,413                                       |
| No. of unique reflections                       | 41,094                                        |
| Mean <I/σ>                                      | 11.5 (2.2)                                    |
| R <sub>merge</sub> (I) (%)                      | 8.1 (65.6)                                    |
| R <sub>cryst</sub> (F) (%)                      | 13.8 (32.2)                                   |
| R <sub>free</sub> (F) (%)                       | 19.3                                          |
| No. of amino acids                              | 138                                           |
| No. of water molecules                          | 232                                           |
| No. of chloride ions                            | 1                                             |
| rms deviations from ideal bond lengths (Å)      | 0.011                                         |
| Average B-factors protein (Å <sup>2</sup> )     | 17.4                                          |
| Average B-factors 5-78 ligand (Å <sup>2</sup> ) | 32.9                                          |

**Table S2a:** Mean values, standard deviations and standard error of mean for  $^{15}\text{N}$  backbone amide relaxation rates.

| 500 MHz | $R_1$ ( $\text{s}^{-1}$ ) | Std  | SEM  | $R_2$ ( $\text{s}^{-1}$ ) | Std  | SEM  | $\{^1\text{H}\}$ - $^{15}\text{N}$ -NOE | Std  | SEM  |
|---------|---------------------------|------|------|---------------------------|------|------|-----------------------------------------|------|------|
| Apo     | 2.01                      | 0.11 | 0.01 | 9.75                      | 1.08 | 0.10 | 0.74                                    | 0.06 | 0.01 |
| Lac     | 1.82                      | 0.15 | 0.01 | 9.53                      | 2.07 | 0.19 | 0.69                                    | 0.38 | 0.04 |
| L2      | 1.90                      | 0.09 | 0.01 | 9.92                      | 0.87 | 0.08 | 0.76                                    | 0.05 | 0.00 |
| L3      | 1.92                      | 0.09 | 0.01 | 9.75                      | 0.80 | 0.08 | 0.77                                    | 0.04 | 0.00 |
| 600 MHz | $R_1$ ( $\text{s}^{-1}$ ) | Std  | SEM  | $R_2$ ( $\text{s}^{-1}$ ) | Std  | SEM  | $\{^1\text{H}\}$ - $^{15}\text{N}$ -NOE | Std  | SEM  |
| Apo     | 1.63                      | 0.07 | 0.01 | 10.40                     | 1.25 | 0.12 | 0.79                                    | 0.06 | 0.01 |
| Lac     | 1.45                      | 0.09 | 0.01 | 10.44                     | 1.67 | 0.16 | 0.72                                    | 0.35 | 0.03 |
| L2      | 1.51                      | 0.07 | 0.01 | 10.63                     | 1.02 | 0.09 | 0.78                                    | 0.06 | 0.01 |
| L3      | 1.53                      | 0.07 | 0.01 | 10.54                     | 0.86 | 0.08 | 0.79                                    | 0.04 | 0.00 |

**Table S2b:** Mean values, standard deviations and standard error of mean for  $^{15}\text{N}$  side-chain relaxation rates.

| 500 MHz | $R_1$ ( $\text{s}^{-1}$ ) | Std  | SEM  | $R_2$ ( $\text{s}^{-1}$ ) | Std  | SEM  | $\{^1\text{H}\}$ - $^{15}\text{N}$ -NOE | Std  | SEM  |
|---------|---------------------------|------|------|---------------------------|------|------|-----------------------------------------|------|------|
| Apo     | 1.15                      | 0.77 | 0.31 | 7.89                      | 4.39 | 1.79 | -0.66                                   | 1.84 | 0.75 |
| Lac     | 1.52                      | 0.25 | 0.10 | 7.84                      | 1.92 | 0.79 | 0.56                                    | 0.24 | 0.10 |
| L2      | 1.62                      | 0.21 | 0.08 | 8.54                      | 1.46 | 0.55 | 0.63                                    | 0.24 | 0.09 |
| L3      | 1.62                      | 0.19 | 0.08 | 8.52                      | 1.86 | 0.76 | 0.61                                    | 0.27 | 0.11 |
| 600 MHz | $R_1$ ( $\text{s}^{-1}$ ) | Std  | SEM  | $R_2$ ( $\text{s}^{-1}$ ) | Std  | SEM  | $\{^1\text{H}\}$ - $^{15}\text{N}$ -NOE | Std  | SEM  |
| Apo     | 0.96                      | 0.56 | 0.23 | 8.38                      | 4.19 | 1.71 | -0.50                                   | 1.66 | 0.68 |
| Lac     | 1.23                      | 0.08 | 0.03 | 8.48                      | 1.82 | 0.74 | 0.58                                    | 0.22 | 0.09 |
| L2      | 1.27                      | 0.11 | 0.04 | 9.49                      | 1.75 | 0.66 | 0.64                                    | 0.28 | 0.10 |
| L3      | 1.27                      | 0.12 | 0.05 | 9.18                      | 1.88 | 0.77 | 0.62                                    | 0.23 | 0.09 |

**Table S2c:** Mean values, standard deviations and standard error of mean for  $^2\text{H}$  side-chain methyl relaxation rates. Units in  $\text{s}^{-1}$ .

|     | $R_z^a$ | Std   | SEM  | $R_+^b$ | Std   | SEM  | $R_{z2}^c$ | Std  | SEM  | $R_{+z}^d$ | Std   | SEM  |
|-----|---------|-------|------|---------|-------|------|------------|------|------|------------|-------|------|
| Apo | 21.40   | 9.34  | 1.13 | 90.38   | 26.20 | 3.18 | 18.07      | 8.03 | 0.97 | 75.50      | 24.99 | 3.03 |
| Lac | 21.58   | 10.77 | 1.31 | 90.38   | 25.52 | 3.09 | 18.03      | 7.74 | 0.94 | 75.80      | 27.06 | 3.28 |
| L2  | 21.45   | 10.62 | 1.29 | 88.39   | 24.25 | 2.92 | 18.05      | 7.33 | 0.89 | 73.51      | 26.65 | 3.21 |
| L3  | 21.70   | 11.74 | 1.45 | 90.42   | 28.04 | 3.45 | 16.77      | 7.23 | 0.89 | 72.37      | 27.68 | 3.41 |

<sup>a</sup>  $R(D_z)$

<sup>b</sup>  $R(D_+)$

<sup>c</sup>  $R(3D_z^2-2)$

<sup>d</sup>  $R(D_+D_z + D_zD_+)$

**Table S2d:** Mean values, standard deviations and standard error of mean for  $^{15}\text{N}$   $R_{2dd}$  backbone amide relaxation rates.

| 500 MHz | $R_{2dd}$ ( $\text{s}^{-1}$ ) | Std  | SEM  |
|---------|-------------------------------|------|------|
| Apo     | 6.18                          | 0.53 | 0.05 |

**Table S3a:** Backbone model-free order parameters for apo-Gal3 from  $^{15}\text{N}$  relaxation rates.

| Residue | $O^2$ | std  | $\tau_e$ (ps) | std | $R_{ex}$ ( $\text{s}^{-1}$ ) | std | $O_s^2$ | std  | $O_f^2$ | std  | $\tau_s$ (ps) | std  |
|---------|-------|------|---------------|-----|------------------------------|-----|---------|------|---------|------|---------------|------|
| 115     | 0.72  | 0.01 | 41            | 5   |                              |     |         |      |         |      |               |      |
| 116     | 0.78  | 0.01 | 36            | 9   |                              |     |         |      |         |      |               |      |
| 118     | 0.91  | 0.01 |               |     |                              |     |         |      |         |      |               |      |
| 119     | 0.90  | 0.01 |               |     | 0.5                          | 0.2 |         |      |         |      |               |      |
| 120     | 0.87  | 0.01 |               |     |                              |     |         |      |         |      |               |      |
| 122     | 0.85  | 0.01 | 33            | 13  |                              |     |         |      |         |      |               |      |
| 125     | 0.87  | 0.01 |               |     |                              |     | 0.95    | 0.02 | 0.91    | 0.02 | 1290          | 1257 |
| 126     | 0.79  | 0.01 | 26            | 9   | 0.4                          | 0.2 |         |      |         |      |               |      |
| 127     | 0.84  | 0.01 | 35            | 12  | 0.7                          | 0.2 |         |      |         |      |               |      |
| 129     | 0.87  | 0.01 | 43            | 18  | 0.3                          | 0.2 |         |      |         |      |               |      |
| 130     | 0.87  | 0.01 | 32            | 11  | 0.3                          | 0.1 |         |      |         |      |               |      |
| 131     | 0.94  | 0.01 |               |     |                              |     |         |      |         |      |               |      |
| 132     | 0.90  | 0.01 |               |     |                              |     |         |      |         |      |               |      |
| 134     | 0.90  | 0.01 |               |     |                              |     |         |      |         |      |               |      |
| 135     | 0.89  | 0.01 |               |     | 0.5                          | 0.2 |         |      |         |      |               |      |
| 136     | 0.89  | 0.01 | 46            | 15  |                              |     |         |      |         |      |               |      |
| 137     | 0.89  | 0.01 |               |     |                              |     |         |      |         |      |               |      |
| 138     | 0.89  | 0.01 |               |     | 0.4                          | 0.1 |         |      |         |      |               |      |
| 139     | 0.87  | 0.01 | 34            | 16  | 0.7                          | 0.2 |         |      |         |      |               |      |
| 142     | 0.77  | 0.01 |               |     |                              |     | 0.92    | 0.01 | 0.84    | 0.01 | 842           | 189  |
| 143     | 0.84  | 0.01 |               |     | 0.4                          | 0.2 |         |      |         |      |               |      |
| 144     | 0.91  | 0.01 |               |     |                              |     |         |      |         |      |               |      |
| 145     | 0.87  | 0.01 |               |     |                              |     |         |      |         |      |               |      |
| 146     | 0.90  | 0.01 |               |     |                              |     |         |      |         |      |               |      |
| 147     | 0.87  | 0.01 |               |     | 0.4                          | 0.2 |         |      |         |      |               |      |
| 148     | 0.85  | 0.01 |               |     |                              |     |         |      |         |      |               |      |
| 150     | 0.88  | 0.01 | 36            | 16  |                              |     |         |      |         |      |               |      |

|     |      |      |    |    |     |     |      |      |      |      |     |     |
|-----|------|------|----|----|-----|-----|------|------|------|------|-----|-----|
| 151 | 0.86 | 0.01 | 36 | 14 | 0.7 | 0.2 |      |      |      |      |     |     |
| 154 | 0.87 | 0.01 | 22 | 13 | 0.7 | 0.1 |      |      |      |      |     |     |
| 155 | 0.87 | 0.01 |    |    | 0.5 | 0.2 |      |      |      |      |     |     |
| 156 | 0.91 | 0.01 |    |    |     |     |      |      |      |      |     |     |
| 157 | 0.94 | 0.01 |    |    |     |     |      |      |      |      |     |     |
| 158 | 0.96 | 0.01 |    |    |     |     |      |      |      |      |     |     |
| 159 | 0.88 | 0.01 | 28 | 17 |     |     |      |      |      |      |     |     |
| 160 | 0.87 | 0.02 |    |    | 0.8 | 0.3 |      |      |      |      |     |     |
| 163 | 0.90 | 0.01 |    |    | 0.4 | 0.2 |      |      |      |      |     |     |
| 164 | 0.88 | 0.01 | 77 | 22 | 0.5 | 0.2 |      |      |      |      |     |     |
| 165 | 0.82 | 0.01 |    |    |     |     | 0.92 | 0.01 | 0.89 | 0.01 | 888 | 292 |
| 167 | 0.91 | 0.01 | 73 | 28 |     |     |      |      |      |      |     |     |
| 168 | 0.82 | 0.01 | 49 | 9  |     |     |      |      |      |      |     |     |
| 169 | 0.79 | 0.01 |    |    |     |     | 0.95 | 0.02 | 0.84 | 0.03 | 940 | 636 |
| 171 | 0.89 | 0.01 | 54 | 22 |     |     |      |      |      |      |     |     |
| 172 | 0.91 | 0.01 |    |    |     |     |      |      |      |      |     |     |
| 173 | 0.86 | 0.01 | 66 | 22 | 6.7 | 0.3 |      |      |      |      |     |     |
| 174 | 0.91 | 0.01 |    |    | 0.5 | 0.2 |      |      |      |      |     |     |
| 175 | 0.83 | 0.01 | 45 | 14 | 0.7 | 0.2 |      |      |      |      |     |     |
| 176 | 0.91 | 0.01 |    |    |     |     |      |      |      |      |     |     |
| 177 | 0.86 | 0.01 | 29 | 14 | 0.5 | 0.2 |      |      |      |      |     |     |
| 178 | 0.89 | 0.01 | 64 | 19 |     |     |      |      |      |      |     |     |
| 179 | 0.90 | 0.01 |    |    | 1.5 | 0.2 |      |      |      |      |     |     |
| 180 | 0.82 | 0.01 |    |    | 0.6 | 0.1 |      |      |      |      |     |     |
| 181 | 0.90 | 0.01 |    |    | 0.8 | 0.3 |      |      |      |      |     |     |
| 182 | 0.88 | 0.01 |    |    |     |     |      |      |      |      |     |     |
| 183 | 0.92 | 0.01 |    |    | 1.3 | 0.3 |      |      |      |      |     |     |
| 184 | 0.85 | 0.01 | 57 | 15 | 0.8 | 0.2 |      |      |      |      |     |     |
| 185 | 0.86 | 0.01 |    |    | 0.8 | 0.2 |      |      |      |      |     |     |

|     |      |      |    |    |     |     |
|-----|------|------|----|----|-----|-----|
| 186 | 0.86 | 0.03 |    |    | 2.7 | 0.6 |
| 187 | 0.85 | 0.01 | 50 | 16 | 0.6 | 0.2 |
| 189 | 0.84 | 0.01 | 40 | 14 | 4.5 | 0.2 |
| 190 | 0.88 | 0.02 | 38 | 23 | 0.9 | 0.3 |
| 192 | 0.71 | 0.01 | 17 | 5  |     |     |
| 193 | 0.82 | 0.01 |    |    | 0.8 | 0.2 |
| 194 | 0.84 | 0.02 | 51 | 27 |     |     |
| 195 | 0.86 | 0.01 | 38 | 15 |     |     |
| 196 | 0.88 | 0.01 |    |    |     |     |
| 198 | 0.89 | 0.01 |    |    |     |     |
| 199 | 0.88 | 0.01 |    |    | 0.5 | 0.2 |
| 200 | 0.89 | 0.01 |    |    |     |     |
| 202 | 0.86 | 0.01 |    |    | 0.7 | 0.2 |
| 203 | 0.92 | 0.01 |    |    |     |     |
| 204 | 0.90 | 0.01 |    |    | 0.5 | 0.2 |
| 205 | 0.90 | 0.01 | 49 | 16 | 0.6 | 0.1 |
| 207 | 0.95 | 0.02 |    |    | 2.0 | 0.3 |
| 208 | 0.93 | 0.01 |    |    | 1.0 | 0.2 |
| 209 | 0.90 | 0.01 |    |    |     |     |
| 210 | 0.87 | 0.01 |    |    | 3.4 | 0.2 |
| 212 | 0.89 | 0.01 |    |    | 0.6 | 0.2 |
| 213 | 0.88 | 0.01 |    |    | 1.0 | 0.2 |
| 214 | 0.88 | 0.01 | 51 | 17 | 0.7 | 0.2 |
| 215 | 0.89 | 0.01 | 41 | 20 | 1.9 | 0.2 |
| 216 | 0.85 | 0.00 |    |    |     |     |
| 218 | 0.87 | 0.01 |    |    | 1.3 | 0.2 |
| 219 | 0.89 | 0.01 |    |    | 8.4 | 0.3 |
| 220 | 0.90 | 0.01 |    |    | 0.4 | 0.2 |
| 221 | 0.87 | 0.01 | 37 | 14 | 0.8 | 0.2 |

|     |      |      |    |    |     |     |      |      |      |      |      |      |
|-----|------|------|----|----|-----|-----|------|------|------|------|------|------|
| 222 | 0.89 | 0.01 |    |    | 0.7 | 0.2 |      |      |      |      |      |      |
| 223 | 0.89 | 0.01 |    |    |     |     |      |      |      |      |      |      |
| 224 | 0.89 | 0.01 |    |    | 0.7 | 0.3 |      |      |      |      |      |      |
| 225 | 0.76 | 0.01 | 27 | 8  | 0.5 | 0.2 |      |      |      |      |      |      |
| 227 | 0.87 | 0.02 |    |    |     |     |      |      |      |      |      |      |
| 228 | 0.84 | 0.01 |    |    |     |     | 0.95 | 0.02 | 0.89 | 0.02 | 1377 | 1257 |
| 229 | 0.95 | 0.01 | 66 | 44 |     |     |      |      |      |      |      |      |
| 230 | 0.91 | 0.01 |    |    |     |     |      |      |      |      |      |      |
| 231 | 0.91 | 0.01 |    |    | 0.3 | 0.2 |      |      |      |      |      |      |
| 232 | 0.77 | 0.01 |    |    |     |     | 0.93 | 0.03 | 0.83 | 0.04 | 627  | 257  |
| 233 | 0.95 | 0.01 |    |    |     |     |      |      |      |      |      |      |
| 234 | 0.89 | 0.01 | 52 | 19 |     |     |      |      |      |      |      |      |
| 235 | 0.91 | 0.01 |    |    |     |     |      |      |      |      |      |      |
| 236 | 0.87 | 0.01 |    |    | 1.1 | 0.2 |      |      |      |      |      |      |
| 237 | 0.93 | 0.01 |    |    |     |     |      |      |      |      |      |      |
| 238 | 0.91 | 0.01 | 57 | 23 |     |     |      |      |      |      |      |      |
| 240 | 0.85 | 0.01 | 65 | 13 | 0.8 | 0.2 |      |      |      |      |      |      |
| 241 | 0.87 | 0.01 |    |    |     |     |      |      |      |      |      |      |
| 243 | 0.92 | 0.01 |    |    | 0.5 | 0.3 |      |      |      |      |      |      |
| 244 | 0.87 | 0.01 |    |    | 0.2 | 0.1 |      |      |      |      |      |      |
| 245 | 0.88 | 0.01 |    |    |     |     | 0.96 | 0.02 | 0.92 | 0.02 | 1138 | 1169 |
| 246 | 0.89 | 0.01 |    |    |     |     |      |      |      |      |      |      |
| 247 | 0.89 | 0.01 | 23 | 14 |     |     |      |      |      |      |      |      |
| 248 | 0.89 | 0.01 |    |    |     |     |      |      |      |      |      |      |
| 249 | 0.84 | 0.01 | 32 | 13 |     |     |      |      |      |      |      |      |
| 250 | 0.82 | 0.01 |    |    |     |     | 0.94 | 0.02 | 0.87 | 0.03 | 903  | 555  |



**Table S3b:** Backbone modelfree order parameters for lac-Gal3 from  $^{15}\text{N}$  relaxation rates.

| Residue | $O^2$ | std  | $\tau_e$ (ps) | std | $R_{ex}$ ( $\text{s}^{-1}$ ) | std | $O_s^2$ | std  | $O_f^2$ | std  | $\tau_s$ (ps) | std |
|---------|-------|------|---------------|-----|------------------------------|-----|---------|------|---------|------|---------------|-----|
| 114     | 0.06  | 0.01 |               |     |                              |     | 0.08    | 0.01 | 0.73    | 0.02 | 587           | 22  |
| 115     | 0.39  | 0.01 |               |     |                              |     | 0.66    | 0.01 | 0.60    | 0.01 | 2408          | 489 |
| 116     | 0.78  | 0.01 | 38            | 9   |                              |     |         |      |         |      |               |     |
| 118     | 0.89  | 0.01 | 48            | 22  |                              |     |         |      |         |      |               |     |
| 119     | 0.80  | 0.01 | 45            | 10  |                              |     |         |      |         |      |               |     |
| 120     | 0.85  | 0.01 |               |     |                              |     |         |      |         |      |               |     |
| 122     | 0.84  | 0.01 |               |     | 0.4                          | 0.2 |         |      |         |      |               |     |
| 124     | 0.04  | 0.01 |               |     |                              |     | 0.06    | 0.01 | 0.70    | 0.01 | 668           | 18  |
| 125     | 0.86  | 0.01 | 32            | 13  | 0.3                          | 0.2 |         |      |         |      |               |     |
| 126     | 0.78  | 0.01 | 15            | 9   |                              |     |         |      |         |      |               |     |
| 127     | 0.81  | 0.01 | 33            | 10  | 1.0                          | 0.2 |         |      |         |      |               |     |
| 129     | 0.86  | 0.01 |               |     |                              |     |         |      |         |      |               |     |
| 130     | 0.83  | 0.01 | 43            | 9   | 0.4                          | 0.2 |         |      |         |      |               |     |
| 131     | 0.87  | 0.02 | 51            | 20  | 0.7                          | 0.3 |         |      |         |      |               |     |
| 132     | 0.86  | 0.01 |               |     | 0.5                          | 0.3 |         |      |         |      |               |     |
| 134     | 0.87  | 0.01 |               |     |                              |     |         |      |         |      |               |     |
| 135     | 0.91  | 0.01 |               |     |                              |     |         |      |         |      |               |     |
| 136     | 0.88  | 0.01 |               |     |                              |     |         |      |         |      |               |     |
| 137     | 0.85  | 0.01 |               |     |                              |     |         |      |         |      |               |     |
| 138     | 0.89  | 0.01 |               |     |                              |     |         |      |         |      |               |     |
| 139     | 0.85  | 0.01 | 61            | 14  | 1.9                          | 0.3 |         |      |         |      |               |     |
| 141     | 0.08  | 0.02 |               |     |                              |     | 0.12    | 0.03 | 0.69    | 0.05 | 483           | 72  |
| 142     | 0.77  | 0.01 | 41            | 6   |                              |     |         |      |         |      |               |     |
| 143     | 0.84  | 0.01 |               |     |                              |     |         |      |         |      |               |     |
| 144     | 0.87  | 0.01 | 27            | 17  |                              |     |         |      |         |      |               |     |
| 145     | 0.80  | 0.01 | 76            | 11  | 0.4                          | 0.2 |         |      |         |      |               |     |
| 146     | 0.89  | 0.01 |               |     |                              |     |         |      |         |      |               |     |

|     |      |      |    |    |     |     |      |      |      |      |     |     |
|-----|------|------|----|----|-----|-----|------|------|------|------|-----|-----|
| 147 | 0.84 | 0.01 | 15 | 9  |     |     |      |      |      |      |     |     |
| 148 | 0.82 | 0.01 |    |    | 0.5 | 0.2 |      |      |      |      |     |     |
| 149 | 0.88 | 0.01 |    |    |     |     |      |      |      |      |     |     |
| 150 | 0.87 | 0.01 |    |    | 0.5 | 0.2 |      |      |      |      |     |     |
| 151 | 0.85 | 0.01 |    |    | 1.1 | 0.2 |      |      |      |      |     |     |
| 154 | 0.85 | 0.01 | 31 | 12 |     |     |      |      |      |      |     |     |
| 155 | 0.85 | 0.01 |    |    | 0.5 | 0.2 |      |      |      |      |     |     |
| 156 | 0.88 | 0.01 |    |    |     |     |      |      |      |      |     |     |
| 157 | 0.89 | 0.01 |    |    |     |     |      |      |      |      |     |     |
| 158 | 0.91 | 0.01 |    |    |     |     |      |      |      |      |     |     |
| 159 | 0.86 | 0.01 |    |    | 0.6 | 0.2 |      |      |      |      |     |     |
| 160 | 0.86 | 0.01 |    |    | 0.4 | 0.2 |      |      |      |      |     |     |
| 163 | 0.86 | 0.01 | 53 | 24 |     |     |      |      |      |      |     |     |
| 164 | 0.89 | 0.01 | 63 | 24 |     |     |      |      |      |      |     |     |
| 167 | 0.86 | 0.01 | 30 | 17 |     |     |      |      |      |      |     |     |
| 168 | 0.81 | 0.01 | 24 | 10 |     |     |      |      |      |      |     |     |
| 169 | 0.77 | 0.01 |    |    |     |     | 0.93 | 0.02 | 0.83 | 0.02 | 977 | 554 |
| 171 | 0.88 | 0.01 |    |    |     |     |      |      |      |      |     |     |
| 172 | 0.87 | 0.01 |    |    |     |     |      |      |      |      |     |     |
| 173 | 0.85 | 0.01 |    |    | 0.4 | 0.2 |      |      |      |      |     |     |
| 174 | 0.87 | 0.01 |    |    | 0.5 | 0.2 |      |      |      |      |     |     |
| 175 | 0.81 | 0.01 |    |    | 1.0 | 0.2 |      |      |      |      |     |     |
| 176 | 0.88 | 0.01 |    |    |     |     |      |      |      |      |     |     |
| 177 | 0.65 | 0.01 |    |    |     |     | 0.81 | 0.01 | 0.80 | 0.01 | 603 | 75  |
| 178 | 0.86 | 0.01 | 21 | 11 |     |     |      |      |      |      |     |     |
| 179 | 0.86 | 0.01 |    |    | 1.4 | 0.2 |      |      |      |      |     |     |
| 180 | 0.80 | 0.01 | 13 | 7  | 0.5 | 0.1 |      |      |      |      |     |     |
| 181 | 0.86 | 0.01 |    |    |     |     |      |      |      |      |     |     |
| 182 | 0.83 | 0.01 |    |    | 0.7 | 0.2 |      |      |      |      |     |     |

|     |      |      |    |    |     |     |      |      |      |      |      |      |
|-----|------|------|----|----|-----|-----|------|------|------|------|------|------|
| 183 | 0.92 | 0.01 |    |    |     |     |      |      |      |      |      |      |
| 184 | 0.83 | 0.01 | 17 | 10 | 0.5 | 0.2 |      |      |      |      |      |      |
| 185 | 0.86 | 0.01 |    |    |     |     |      |      |      |      |      |      |
| 186 | 0.80 | 0.02 | 31 | 18 | 1.3 | 0.5 |      |      |      |      |      |      |
| 187 | 0.82 | 0.02 |    |    |     |     | 0.95 | 0.02 | 0.86 | 0.02 | 2871 | 2331 |
| 189 | 0.74 | 0.01 | 67 | 7  | 3.7 | 0.2 |      |      |      |      |      |      |
| 190 | 0.89 | 0.01 |    |    |     |     |      |      |      |      |      |      |
| 192 | 0.66 | 0.01 | 12 | 4  | 0.3 | 0.2 |      |      |      |      |      |      |
| 193 | 0.83 | 0.01 |    |    |     |     |      |      |      |      |      |      |
| 194 | 0.82 | 0.01 |    |    |     |     |      |      |      |      |      |      |
| 195 | 0.85 | 0.01 |    |    |     |     |      |      |      |      |      |      |
| 196 | 0.83 | 0.01 | 21 | 10 | 0.8 | 0.2 |      |      |      |      |      |      |
| 198 | 0.87 | 0.01 |    |    |     |     |      |      |      |      |      |      |
| 199 | 0.90 | 0.01 |    |    |     |     |      |      |      |      |      |      |
| 200 | 0.87 | 0.01 |    |    |     |     |      |      |      |      |      |      |
| 201 | 0.86 | 0.01 | 28 | 12 |     |     |      |      |      |      |      |      |
| 202 | 0.84 | 0.01 |    |    | 0.4 | 0.2 |      |      |      |      |      |      |
| 203 | 0.90 | 0.01 |    |    |     |     |      |      |      |      |      |      |
| 204 | 0.89 | 0.01 |    |    |     |     |      |      |      |      |      |      |
| 205 | 0.87 | 0.01 | 39 | 14 | 0.4 | 0.2 |      |      |      |      |      |      |
| 207 | 0.86 | 0.01 | 55 | 17 |     |     |      |      |      |      |      |      |
| 208 | 0.88 | 0.01 |    |    | 0.6 | 0.2 |      |      |      |      |      |      |
| 209 | 0.87 | 0.01 |    |    |     |     |      |      |      |      |      |      |
| 210 | 0.85 | 0.01 |    |    |     |     |      |      |      |      |      |      |
| 212 | 0.91 | 0.01 |    |    |     |     |      |      |      |      |      |      |
| 213 | 0.85 | 0.01 | 20 | 12 | 0.5 | 0.2 |      |      |      |      |      |      |
| 214 | 0.90 | 0.01 | 35 | 22 |     |     |      |      |      |      |      |      |
| 215 | 0.88 | 0.01 |    |    | 0.8 | 0.2 |      |      |      |      |      |      |
| 216 | 0.84 | 0.01 |    |    |     |     |      |      |      |      |      |      |

|     |      |      |    |    |     |     |      |      |      |      |     |    |
|-----|------|------|----|----|-----|-----|------|------|------|------|-----|----|
| 218 | 0.89 | 0.01 |    |    | 0.6 | 0.3 |      |      |      |      |     |    |
| 219 | 0.88 | 0.02 | 32 | 21 | 6.8 | 0.4 |      |      |      |      |     |    |
| 220 | 0.85 | 0.01 |    |    | 0.6 | 0.2 |      |      |      |      |     |    |
| 222 | 0.88 | 0.01 |    |    |     |     |      |      |      |      |     |    |
| 223 | 0.86 | 0.01 |    |    |     |     |      |      |      |      |     |    |
| 224 | 0.87 | 0.01 | 40 | 26 |     |     |      |      |      |      |     |    |
| 225 | 0.60 | 0.01 |    |    |     |     | 0.79 | 0.01 | 0.76 | 0.01 | 603 | 70 |
| 227 | 0.75 | 0.02 | 57 | 12 | 0.7 | 0.4 |      |      |      |      |     |    |
| 228 | 0.86 | 0.01 |    |    |     |     |      |      |      |      |     |    |
| 229 | 0.91 | 0.01 |    |    |     |     |      |      |      |      |     |    |
| 230 | 0.90 | 0.01 |    |    |     |     |      |      |      |      |     |    |
| 231 | 0.86 | 0.01 | 29 | 15 | 1.1 | 0.2 |      |      |      |      |     |    |
| 232 | 0.77 | 0.01 | 53 | 8  |     |     |      |      |      |      |     |    |
| 233 | 0.90 | 0.01 |    |    | 0.6 | 0.2 |      |      |      |      |     |    |
| 234 | 0.85 | 0.01 |    |    | 0.5 | 0.2 |      |      |      |      |     |    |
| 235 | 0.88 | 0.01 |    |    |     |     |      |      |      |      |     |    |
| 236 | 0.86 | 0.01 | 43 | 14 |     |     |      |      |      |      |     |    |
| 237 | 0.92 | 0.01 |    |    |     |     |      |      |      |      |     |    |
| 238 | 0.89 | 0.01 |    |    |     |     |      |      |      |      |     |    |
| 240 | 0.87 | 0.01 |    |    |     |     |      |      |      |      |     |    |
| 241 | 0.88 | 0.01 |    |    |     |     |      |      |      |      |     |    |
| 243 | 0.93 | 0.01 |    |    |     |     |      |      |      |      |     |    |
| 244 | 0.85 | 0.01 |    |    |     |     |      |      |      |      |     |    |
| 245 | 0.80 | 0.01 | 58 | 9  |     |     |      |      |      |      |     |    |
| 246 | 0.86 | 0.01 |    |    |     |     |      |      |      |      |     |    |
| 247 | 0.86 | 0.01 |    |    |     |     |      |      |      |      |     |    |
| 248 | 0.88 | 0.01 |    |    | 0.4 | 0.2 |      |      |      |      |     |    |
| 249 | 0.73 | 0.01 | 58 | 7  |     |     |      |      |      |      |     |    |

**Table S3c:** Backbone modelfree order parameters for L2-Gal3 from  $^{15}\text{N}$  relaxation rates.

| Residue | $O^2$ | std  | $\tau_e$ (ps) | std | $R_{ex}$ ( $\text{s}^{-1}$ ) | std | $O^2_s$ | std  | $O^2_f$ | std  | $\tau_s$ (ps) | std  |
|---------|-------|------|---------------|-----|------------------------------|-----|---------|------|---------|------|---------------|------|
| 114     | 0.64  | 0.02 |               |     |                              |     | 0.76    | 0.03 | 0.84    | 0.02 | 527           | 128  |
| 115     | 0.68  | 0.01 |               |     |                              |     | 0.89    | 0.01 | 0.77    | 0.01 | 980           | 137  |
| 116     | 0.76  | 0.00 | 34            | 6   |                              |     |         |      |         |      |               |      |
| 118     | 0.87  | 0.01 |               |     |                              |     | 0.96    | 0.02 | 0.91    | 0.02 | 929           | 424  |
| 119     | 0.87  | 0.00 |               |     |                              |     |         |      |         |      |               |      |
| 120     | 0.86  | 0.00 |               |     |                              |     |         |      |         |      |               |      |
| 122     | 0.82  | 0.01 | 28            | 6   | 0.3                          | 0.1 |         |      |         |      |               |      |
| 125     | 0.87  | 0.00 |               |     | 0.7                          | 0.1 |         |      |         |      |               |      |
| 126     | 0.81  | 0.00 | 22            | 6   |                              |     |         |      |         |      |               |      |
| 127     | 0.81  | 0.01 | 21            | 7   | 1.2                          | 0.1 |         |      |         |      |               |      |
| 129     | 0.85  | 0.01 |               |     |                              |     | 0.97    | 0.04 | 0.88    | 0.04 | 1000          | 559  |
| 130     | 0.86  | 0.01 |               |     | 0.9                          | 0.1 |         |      |         |      |               |      |
| 131     | 0.91  | 0.01 |               |     | 0.3                          | 0.1 |         |      |         |      |               |      |
| 132     | 0.87  | 0.01 |               |     |                              |     |         |      |         |      |               |      |
| 133     | 0.89  | 0.00 |               |     | 0.2                          | 0.1 |         |      |         |      |               |      |
| 134     | 0.87  | 0.01 | 21            | 9   |                              |     |         |      |         |      |               |      |
| 135     | 0.85  | 0.01 |               |     |                              |     | 0.95    | 0.01 | 0.89    | 0.01 | 2252          | 1452 |
| 136     | 0.85  | 0.01 |               |     |                              |     | 0.96    | 0.01 | 0.89    | 0.01 | 2858          | 2591 |
| 137     | 0.87  | 0.01 |               |     |                              |     |         |      |         |      |               |      |
| 139     | 0.84  | 0.01 | 33            | 9   | 1.6                          | 0.1 |         |      |         |      |               |      |
| 142     | 0.76  | 0.00 | 37            | 4   | 0.6                          | 0.1 |         |      |         |      |               |      |
| 143     | 0.85  | 0.01 | 18            | 8   |                              |     |         |      |         |      |               |      |
| 144     | 0.88  | 0.00 |               |     | 0.6                          | 0.1 |         |      |         |      |               |      |
| 145     | 0.88  | 0.01 |               |     | 0.2                          | 0.1 |         |      |         |      |               |      |
| 146     | 0.89  | 0.00 |               |     | 0.2                          | 0.1 |         |      |         |      |               |      |
| 147     | 0.89  | 0.01 |               |     |                              |     |         |      |         |      |               |      |

|     |      |      |    |    |     |     |      |      |      |      |      |      |  |
|-----|------|------|----|----|-----|-----|------|------|------|------|------|------|--|
| 148 | 0.85 | 0.00 |    |    |     |     |      |      |      |      |      |      |  |
| 149 | 0.87 | 0.01 | 28 | 8  |     |     |      |      |      |      |      |      |  |
| 150 | 0.87 | 0.00 |    |    |     |     |      |      |      |      |      |      |  |
| 151 | 0.87 | 0.01 | 20 | 10 | 0.3 | 0.1 |      |      |      |      |      |      |  |
| 154 | 0.87 | 0.00 | 19 | 8  | 0.5 | 0.1 |      |      |      |      |      |      |  |
| 155 | 0.86 | 0.01 | 21 | 10 | 0.5 | 0.1 |      |      |      |      |      |      |  |
| 156 | 0.90 | 0.00 |    |    |     |     |      |      |      |      |      |      |  |
| 157 | 0.89 | 0.01 | 33 | 13 | 0.3 | 0.1 |      |      |      |      |      |      |  |
| 158 | 0.89 | 0.01 |    |    | 0.8 | 0.1 |      |      |      |      |      |      |  |
| 159 | 0.89 | 0.01 |    |    |     |     |      |      |      |      |      |      |  |
| 160 | 0.85 | 0.00 |    |    | 0.5 | 0.1 |      |      |      |      |      |      |  |
| 163 | 0.88 | 0.01 | 39 | 13 | 0.5 | 0.2 |      |      |      |      |      |      |  |
| 164 | 0.88 | 0.01 | 23 | 11 | 0.7 | 0.1 |      |      |      |      |      |      |  |
| 167 | 0.85 | 0.01 |    |    |     |     | 0.98 | 0.01 | 0.87 | 0.01 | 2705 | 1759 |  |
| 168 | 0.80 | 0.00 | 14 | 4  | 0.6 | 0.1 |      |      |      |      |      |      |  |
| 169 | 0.81 | 0.00 | 28 | 5  |     |     |      |      |      |      |      |      |  |
| 170 | 0.88 | 0.00 |    |    | 0.3 | 0.1 |      |      |      |      |      |      |  |
| 171 | 0.87 | 0.01 |    |    | 0.3 | 0.1 |      |      |      |      |      |      |  |
| 172 | 0.86 | 0.01 | 34 | 10 | 0.6 | 0.1 |      |      |      |      |      |      |  |
| 173 | 0.86 | 0.01 | 23 | 12 | 0.2 | 0.1 |      |      |      |      |      |      |  |
| 174 | 0.88 | 0.01 |    |    | 0.3 | 0.1 |      |      |      |      |      |      |  |
| 175 | 0.84 | 0.00 |    |    | 0.5 | 0.1 |      |      |      |      |      |      |  |
| 176 | 0.91 | 0.00 |    |    |     |     |      |      |      |      |      |      |  |
| 177 | 0.86 | 0.01 | 19 | 12 |     |     |      |      |      |      |      |      |  |
| 178 | 0.87 | 0.00 | 37 | 7  |     |     |      |      |      |      |      |      |  |
| 179 | 0.84 | 0.01 | 20 | 6  | 1.6 | 0.1 |      |      |      |      |      |      |  |
| 180 | 0.83 | 0.00 |    |    | 0.4 | 0.1 |      |      |      |      |      |      |  |
| 181 | 0.86 | 0.00 |    |    |     |     |      |      |      |      |      |      |  |
| 182 | 0.85 | 0.01 |    |    | 0.4 | 0.1 |      |      |      |      |      |      |  |

|     |      |      |    |    |     |     |
|-----|------|------|----|----|-----|-----|
| 183 | 0.88 | 0.00 |    |    | 0.9 | 0.1 |
| 184 | 0.83 | 0.00 | 19 | 7  | 0.7 | 0.1 |
| 185 | 0.87 | 0.00 |    |    |     |     |
| 186 | 0.81 | 0.01 | 18 | 11 | 1.2 | 0.1 |
| 187 | 0.86 | 0.01 |    |    | 0.8 | 0.1 |
| 189 | 0.79 | 0.01 | 13 | 8  | 4.9 | 0.2 |
| 190 | 0.85 | 0.01 | 37 | 8  | 0.9 | 0.1 |
| 192 | 0.65 | 0.01 | 16 | 2  | 0.7 | 0.1 |
| 193 | 0.82 | 0.01 | 20 | 7  |     |     |
| 194 | 0.85 | 0.01 | 39 | 11 |     |     |
| 195 | 0.83 | 0.00 | 31 | 7  | 0.6 | 0.1 |
| 196 | 0.83 | 0.01 | 25 | 6  | 0.9 | 0.1 |
| 198 | 0.86 | 0.00 | 27 | 7  |     |     |
| 199 | 0.88 | 0.01 | 17 | 9  |     |     |
| 200 | 0.87 | 0.00 |    |    |     |     |
| 201 | 0.87 | 0.01 | 21 | 8  |     |     |
| 202 | 0.85 | 0.01 | 19 | 7  | 0.3 | 0.1 |
| 203 | 0.90 | 0.01 | 32 | 15 |     |     |
| 204 | 0.88 | 0.01 | 17 | 9  | 0.7 | 0.1 |
| 207 | 0.89 | 0.01 |    |    | 2.1 | 0.1 |
| 208 | 0.89 | 0.01 |    |    | 1.2 | 0.1 |
| 209 | 0.88 | 0.00 |    |    | 0.3 | 0.1 |
| 210 | 0.87 | 0.01 | 20 | 12 | 1.6 | 0.2 |
| 211 | 0.88 | 0.01 |    |    | 5.0 | 0.1 |
| 212 | 0.89 | 0.00 | 18 | 10 |     |     |
| 213 | 0.87 | 0.00 |    |    | 0.8 | 0.1 |
| 214 | 0.89 | 0.00 | 22 | 11 |     |     |
| 215 | 0.88 | 0.01 |    |    | 1.5 | 0.2 |
| 216 | 0.83 | 0.00 |    |    | 0.5 | 0.1 |

|     |      |      |    |    |     |     |      |      |      |      |      |      |
|-----|------|------|----|----|-----|-----|------|------|------|------|------|------|
| 218 | 0.89 | 0.00 |    |    | 1.0 | 0.1 |      |      |      |      |      |      |
| 219 | 0.91 | 0.00 |    |    | 5.6 | 0.1 |      |      |      |      |      |      |
| 220 | 0.88 | 0.01 | 30 | 12 | 0.4 | 0.1 |      |      |      |      |      |      |
| 222 | 0.90 | 0.00 |    |    |     |     |      |      |      |      |      |      |
| 223 | 0.85 | 0.01 |    |    | 0.7 | 0.1 |      |      |      |      |      |      |
| 224 | 0.83 | 0.01 | 26 | 11 | 1.5 | 0.1 |      |      |      |      |      |      |
| 225 | 0.72 | 0.01 | 20 | 4  | 1.5 | 0.1 |      |      |      |      |      |      |
| 227 | 0.79 | 0.01 | 47 | 6  | 0.9 | 0.2 |      |      |      |      |      |      |
| 228 | 0.82 | 0.01 | 15 | 7  | 0.5 | 0.1 |      |      |      |      |      |      |
| 229 | 0.88 | 0.00 |    |    | 1.0 | 0.1 |      |      |      |      |      |      |
| 230 | 0.88 | 0.01 |    |    |     |     | 0.98 | 0.00 | 0.90 | 0.01 | 1478 | 1533 |
| 231 | 0.88 | 0.01 | 15 | 8  | 0.7 | 0.1 |      |      |      |      |      |      |
| 232 | 0.77 | 0.01 | 35 | 5  | 0.2 | 0.1 |      |      |      |      |      |      |
| 233 | 0.91 | 0.01 | 52 | 10 | 0.5 | 0.1 |      |      |      |      |      |      |
| 234 | 0.88 | 0.00 |    |    |     |     |      |      |      |      |      |      |
| 235 | 0.87 | 0.01 | 22 | 12 | 0.5 | 0.1 |      |      |      |      |      |      |
| 236 | 0.87 | 0.00 |    |    |     |     |      |      |      |      |      |      |
| 237 | 0.91 | 0.00 |    |    |     |     |      |      |      |      |      |      |
| 238 | 0.88 | 0.00 |    |    |     |     |      |      |      |      |      |      |
| 239 | 0.86 | 0.00 |    |    |     |     |      |      |      |      |      |      |
| 240 | 0.88 | 0.00 | 16 | 7  |     |     |      |      |      |      |      |      |
| 241 | 0.85 | 0.01 |    |    |     |     | 0.97 | 0.01 | 0.87 | 0.00 | 4027 | 2907 |
| 243 | 0.88 | 0.02 |    |    |     |     | 0.95 | 0.02 | 0.93 | 0.01 | 1387 | 2372 |
| 244 | 0.78 | 0.02 |    |    |     |     | 0.91 | 0.02 | 0.86 | 0.01 | 5345 | 2265 |
| 245 | 0.85 | 0.01 |    |    |     |     | 0.94 | 0.01 | 0.90 | 0.01 | 1298 | 315  |
| 246 | 0.87 | 0.00 |    |    |     |     |      |      |      |      |      |      |
| 247 | 0.82 | 0.00 |    |    |     |     | 0.95 | 0.01 | 0.87 | 0.01 | 1765 | 990  |
| 248 | 0.88 | 0.00 | 25 | 7  |     |     |      |      |      |      |      |      |
| 249 | 0.79 | 0.01 |    |    |     |     | 0.96 | 0.07 | 0.83 | 0.07 | 433  | 263  |



**Table S3d:** Backbone modelfree order parameters for L3 from  $^{15}\text{N}$  relaxation rates.

| Residue | $O^2$ | std  | $\tau_e$ (ps) | std | $R_{ex}$ ( $\text{s}^{-1}$ ) | std | $O^2_s$ | std  | $O^2_f$ | std  | $\tau_s$ (ps) | std  |
|---------|-------|------|---------------|-----|------------------------------|-----|---------|------|---------|------|---------------|------|
| 115     | 0.72  | 0.00 | 36            | 4   |                              |     |         |      |         |      |               |      |
| 116     | 0.72  | 0.01 |               |     |                              |     | 0.90    | 0.01 | 0.80    | 0.01 | 1168          | 181  |
| 118     | 0.85  | 0.01 |               |     |                              |     | 0.96    | 0.01 | 0.89    | 0.01 | 2470          | 1453 |
| 119     | 0.87  | 0.01 |               |     |                              |     |         |      |         |      |               |      |
| 120     | 0.84  | 0.01 | 29            | 6   | 0.4                          | 0.1 |         |      |         |      |               |      |
| 122     | 0.81  | 0.00 |               |     | 1.1                          | 0.1 |         |      |         |      |               |      |
| 125     | 0.89  | 0.00 |               |     |                              |     |         |      |         |      |               |      |
| 126     | 0.76  | 0.01 | 9             | 4   | 0.9                          | 0.1 |         |      |         |      |               |      |
| 127     | 0.81  | 0.01 | 23            | 6   | 1.6                          | 0.1 |         |      |         |      |               |      |
| 129     | 0.85  | 0.00 |               |     | 0.6                          | 0.1 |         |      |         |      |               |      |
| 130     | 0.83  | 0.01 | 12            | 6   | 1.6                          | 0.1 |         |      |         |      |               |      |
| 131     | 0.88  | 0.01 | 43            | 14  | 1.0                          | 0.2 |         |      |         |      |               |      |
| 132     | 0.87  | 0.01 |               |     | 0.4                          | 0.1 |         |      |         |      |               |      |
| 134     | 0.88  | 0.00 | 23            | 10  |                              |     |         |      |         |      |               |      |
| 135     | 0.85  | 0.01 |               |     |                              |     | 0.97    | 0.01 | 0.88    | 0.01 | 2007          | 777  |
| 136     | 0.86  | 0.01 |               |     |                              |     | 0.97    | 0.01 | 0.89    | 0.01 | 1652          | 995  |
| 137     | 0.87  | 0.01 |               |     | 0.3                          | 0.1 |         |      |         |      |               |      |
| 139     | 0.86  | 0.01 |               |     | 1.5                          | 0.2 |         |      |         |      |               |      |
| 142     | 0.75  | 0.00 | 25            | 4   | 1.3                          | 0.1 |         |      |         |      |               |      |
| 143     | 0.85  | 0.00 |               |     |                              |     |         |      |         |      |               |      |
| 144     | 0.89  | 0.00 |               |     | 0.4                          | 0.1 |         |      |         |      |               |      |
| 145     | 0.88  | 0.00 |               |     |                              |     |         |      |         |      |               |      |
| 146     | 0.88  | 0.01 |               |     | 0.5                          | 0.1 |         |      |         |      |               |      |
| 147     | 0.87  | 0.01 |               |     | 0.5                          | 0.1 |         |      |         |      |               |      |
| 148     | 0.83  | 0.00 | 10            | 6   | 0.3                          | 0.1 |         |      |         |      |               |      |
| 149     | 0.86  | 0.01 | 16            | 6   | 0.3                          | 0.1 |         |      |         |      |               |      |

|     |      |      |    |    |     |     |      |      |      |      |      |     |
|-----|------|------|----|----|-----|-----|------|------|------|------|------|-----|
| 150 | 0.84 | 0.01 | 14 | 9  | 0.8 | 0.1 |      |      |      |      |      |     |
| 151 | 0.84 | 0.00 |    |    | 1.1 | 0.1 |      |      |      |      |      |     |
| 154 | 0.87 | 0.00 | 15 | 7  | 0.4 | 0.1 |      |      |      |      |      |     |
| 155 | 0.83 | 0.01 |    |    | 1.1 | 0.1 |      |      |      |      |      |     |
| 157 | 0.91 | 0.00 | 24 | 15 |     |     |      |      |      |      |      |     |
| 158 | 0.90 | 0.01 |    |    | 0.9 | 0.2 |      |      |      |      |      |     |
| 159 | 0.88 | 0.00 |    |    |     |     |      |      |      |      |      |     |
| 160 | 0.87 | 0.01 |    |    | 0.7 | 0.2 |      |      |      |      |      |     |
| 163 | 0.88 | 0.01 | 27 | 13 | 0.4 | 0.2 |      |      |      |      |      |     |
| 164 | 0.87 | 0.01 | 17 | 10 | 0.9 | 0.1 |      |      |      |      |      |     |
| 167 | 0.84 | 0.01 |    |    |     |     | 0.96 | 0.01 | 0.87 | 0.01 | 1725 | 625 |
| 168 | 0.79 | 0.00 | 18 | 4  | 1.0 | 0.1 |      |      |      |      |      |     |
| 169 | 0.81 | 0.00 | 23 | 6  |     |     |      |      |      |      |      |     |
| 171 | 0.87 | 0.00 | 14 | 9  |     |     |      |      |      |      |      |     |
| 172 | 0.88 | 0.00 |    |    |     |     |      |      |      |      |      |     |
| 173 | 0.88 | 0.01 | 28 | 12 |     |     |      |      |      |      |      |     |
| 174 | 0.87 | 0.01 |    |    | 0.9 | 0.1 |      |      |      |      |      |     |
| 175 | 0.81 | 0.00 |    |    | 1.2 | 0.1 |      |      |      |      |      |     |
| 176 | 0.86 | 0.01 |    |    | 1.0 | 0.1 |      |      |      |      |      |     |
| 177 | 0.84 | 0.01 |    |    | 0.9 | 0.1 |      |      |      |      |      |     |
| 179 | 0.82 | 0.01 |    |    | 2.2 | 0.1 |      |      |      |      |      |     |
| 180 | 0.82 | 0.00 | 12 | 4  | 0.4 | 0.1 |      |      |      |      |      |     |
| 181 | 0.85 | 0.01 | 21 | 8  | 1.0 | 0.1 |      |      |      |      |      |     |
| 182 | 0.82 | 0.01 | 14 | 6  | 1.4 | 0.1 |      |      |      |      |      |     |
| 183 | 0.89 | 0.01 | 27 | 10 | 0.4 | 0.1 |      |      |      |      |      |     |
| 184 | 0.82 | 0.01 | 10 | 6  | 1.1 | 0.1 |      |      |      |      |      |     |
| 185 | 0.86 | 0.01 | 30 | 9  |     |     |      |      |      |      |      |     |
| 186 | 0.81 | 0.01 | 33 | 8  | 1.3 | 0.2 |      |      |      |      |      |     |
| 187 | 0.87 | 0.00 | 17 | 8  |     |     |      |      |      |      |      |     |

|     |      |      |    |    |     |     |
|-----|------|------|----|----|-----|-----|
| 189 | 0.82 | 0.01 | 14 | 5  | 3.8 | 0.1 |
| 190 | 0.83 | 0.01 | 22 | 7  | 1.4 | 0.1 |
| 192 | 0.64 | 0.01 | 11 | 3  | 1.0 | 0.1 |
| 193 | 0.81 | 0.00 |    |    | 0.9 | 0.1 |
| 194 | 0.81 | 0.01 | 38 | 8  | 1.0 | 0.2 |
| 195 | 0.83 | 0.01 |    |    | 1.1 | 0.1 |
| 196 | 0.81 | 0.01 | 13 | 5  | 1.3 | 0.1 |
| 198 | 0.87 | 0.00 |    |    |     |     |
| 199 | 0.88 | 0.01 | 22 | 10 | 0.3 | 0.1 |
| 200 | 0.88 | 0.00 |    |    |     |     |
| 201 | 0.86 | 0.01 | 13 | 6  | 0.3 | 0.1 |
| 202 | 0.85 | 0.01 |    |    | 0.4 | 0.1 |
| 203 | 0.89 | 0.01 |    |    | 0.4 | 0.1 |
| 204 | 0.88 | 0.01 |    |    | 0.9 | 0.2 |
| 207 | 0.86 | 0.01 |    |    | 2.5 | 0.2 |
| 208 | 0.87 | 0.01 |    |    | 1.9 | 0.1 |
| 209 | 0.82 | 0.01 |    |    | 1.4 | 0.1 |
| 210 | 0.84 | 0.01 | 19 | 6  | 2.6 | 0.2 |
| 212 | 0.87 | 0.01 | 42 | 9  | 0.3 | 0.1 |
| 213 | 0.87 | 0.00 |    |    | 0.5 | 0.1 |
| 214 | 0.90 | 0.00 | 28 | 11 |     |     |
| 215 | 0.86 | 0.01 | 16 | 9  | 1.9 | 0.1 |
| 216 | 0.83 | 0.00 | 19 | 5  |     |     |
| 219 | 0.87 | 0.01 |    |    | 6.0 | 0.2 |
| 220 | 0.87 | 0.01 |    |    | 0.8 | 0.1 |
| 222 | 0.87 | 0.00 |    |    | 0.6 | 0.1 |
| 223 | 0.86 | 0.01 |    |    | 0.7 | 0.1 |
| 224 | 0.86 | 0.01 |    |    | 0.9 | 0.2 |
| 225 | 0.74 | 0.01 | 13 | 4  | 1.0 | 0.1 |

|     |      |      |    |    |     |     |      |      |      |      |      |      |
|-----|------|------|----|----|-----|-----|------|------|------|------|------|------|
| 227 | 0.77 | 0.01 | 28 | 8  | 1.9 | 0.2 |      |      |      |      |      |      |
| 228 | 0.83 | 0.00 | 47 | 7  |     |     |      |      |      |      |      |      |
| 229 | 0.90 | 0.01 | 43 | 9  | 0.5 | 0.1 |      |      |      |      |      |      |
| 230 | 0.89 | 0.00 |    |    |     |     |      |      |      |      |      |      |
| 231 | 0.88 | 0.00 |    |    | 0.5 | 0.1 |      |      |      |      |      |      |
| 232 | 0.75 | 0.00 | 28 | 5  | 0.8 | 0.1 |      |      |      |      |      |      |
| 233 | 0.90 | 0.00 | 34 | 12 | 0.8 | 0.1 |      |      |      |      |      |      |
| 234 | 0.85 | 0.01 | 17 | 5  | 0.6 | 0.1 |      |      |      |      |      |      |
| 235 | 0.87 | 0.00 |    |    | 0.8 | 0.1 |      |      |      |      |      |      |
| 236 | 0.87 | 0.00 |    |    |     |     |      |      |      |      |      |      |
| 237 | 0.91 | 0.01 | 32 | 15 | 0.2 | 0.1 |      |      |      |      |      |      |
| 238 | 0.88 | 0.01 | 28 | 12 |     |     |      |      |      |      |      |      |
| 240 | 0.88 | 0.00 |    |    |     |     |      |      |      |      |      |      |
| 241 | 0.86 | 0.01 |    |    |     |     | 0.98 | 0.02 | 0.88 | 0.02 | 3957 | 1950 |
| 243 | 0.88 | 0.01 |    |    |     |     | 0.94 | 0.01 | 0.94 | 0.01 | 1350 | 912  |
| 244 | 0.87 | 0.00 | 18 | 10 |     |     |      |      |      |      |      |      |
| 245 | 0.88 | 0.00 |    |    |     |     |      |      |      |      |      |      |
| 246 | 0.86 | 0.00 | 30 | 6  | 0.4 | 0.1 |      |      |      |      |      |      |
| 247 | 0.88 | 0.00 |    |    |     |     |      |      |      |      |      |      |
| 248 | 0.86 | 0.01 | 21 | 11 | 0.6 | 0.1 |      |      |      |      |      |      |
| 249 | 0.78 | 0.01 | 25 | 5  | 0.5 | 0.1 |      |      |      |      |      |      |
| 250 | 0.80 | 0.01 | 21 | 5  | 0.8 | 0.1 |      |      |      |      |      |      |

**Table S3e:** Side-chain modelfree order parameters for apo-Gal3 from  $^{15}\text{N}$  relaxation rates.

| Residue | $O^2$ | std  | $\tau_e$ (ps) | std | $R_{ex}$ ( $\text{s}^{-1}$ ) | std | $O_s^2$ | std | $O_f^2$ | std | $\tau_s$ (ps) | std |
|---------|-------|------|---------------|-----|------------------------------|-----|---------|-----|---------|-----|---------------|-----|
| 129     | 0.59  | 0.03 | 71            | 13  |                              |     |         |     |         |     |               |     |
| 162     | 0.91  | 0.03 |               |     | 7.2                          | 0.7 |         |     |         |     |               |     |
| 168     | 0.73  | 0.01 | 73            | 8   | 0.8                          | 0.2 |         |     |         |     |               |     |
| 181     | 0.03  | 0.02 | 48            | 15  | 1.7                          | 0.5 |         |     |         |     |               |     |
| 183     | 0.03  | 0.00 | 23            | 1   | 9.2                          | 0.1 |         |     |         |     |               |     |
| 224     | 0.90  | 0.02 |               |     | 1.9                          | 0.3 |         |     |         |     |               |     |

**Table S3f:** Side-chain modelfree order parameters for lac-Gal3 from  $^{15}\text{N}$  relaxation rates.

| Residue | $O^2$ | std  | $\tau_e$ (ps) | std | $R_{ex}$ ( $\text{s}^{-1}$ ) | std | $O_s^2$ | std  | $O_f^2$ | std  | $\tau_s$ (ps) | std |
|---------|-------|------|---------------|-----|------------------------------|-----|---------|------|---------|------|---------------|-----|
| 129     | 0.41  | 0.04 |               |     |                              |     | 0.60    | 0.05 | 0.69    | 0.03 | 901           | 148 |
| 162     | 0.87  | 0.01 |               |     | 1.5                          | 0.2 |         |      |         |      |               |     |
| 168     | 0.68  | 0.01 |               |     |                              |     | 0.82    | 0.02 | 0.83    | 0.01 | 814           | 112 |
| 181     | 0.91  | 0.02 | 88            | 56  |                              |     |         |      |         |      |               |     |
| 186     | 0.79  | 0.02 | 34            | 19  |                              |     |         |      |         |      |               |     |
| 224     | 0.88  | 0.01 | 44            | 16  | 0.7                          | 0.2 |         |      |         |      |               |     |

**Table S3g:** Side-chain modelfree order parameters for L2-Gal3 from  $^{15}\text{N}$  relaxation rates.

| Residue | $O^2$ | std  | $\tau_e$ (ps) | std | $R_{ex}$ ( $\text{s}^{-1}$ ) | std | $O_s^2$ | std | $O_f^2$ | std | $\tau_s$ (ps) | std |
|---------|-------|------|---------------|-----|------------------------------|-----|---------|-----|---------|-----|---------------|-----|
| 129     | 0.57  | 0.01 | 75            | 5   |                              |     |         |     |         |     |               |     |
| 144     | 0.83  | 0.03 |               |     | 1.9                          | 0.5 |         |     |         |     |               |     |
| 162     | 0.88  | 0.01 | 39            | 10  | 1.3                          | 0.2 |         |     |         |     |               |     |
| 168     | 0.74  | 0.01 | 61            | 4   | 1.0                          | 0.1 |         |     |         |     |               |     |
| 181     | 0.93  | 0.01 |               |     | 0.7                          | 0.1 |         |     |         |     |               |     |
| 186     | 0.85  | 0.01 |               |     | 1.8                          | 0.2 |         |     |         |     |               |     |
| 224     | 0.89  | 0.01 | 42            | 10  | 1.6                          | 0.1 |         |     |         |     |               |     |

**Table S3h:** Side-chain model-free order parameters for L3-Gal3 from  $^{15}\text{N}$  relaxation rates.

| Residue | $O^2$ | std  | $\tau_e$ (ps) | std | $R_{ex}$ ( $\text{s}^{-1}$ ) | std | $O_s^2$ | std  | $O_f^2$ | std  | $\tau_s$ (ps) | std |
|---------|-------|------|---------------|-----|------------------------------|-----|---------|------|---------|------|---------------|-----|
| 129     | 0.53  | 0.02 |               |     |                              |     | 0.72    | 0.02 | 0.74    | 0.01 | 571           | 86  |
| 162     | 0.88  | 0.01 |               |     | 2.0                          | 0.1 |         |      |         |      |               |     |
| 168     | 0.75  | 0.01 | 74            | 4   | 0.3                          | 0.1 |         |      |         |      |               |     |
| 181     | 0.93  | 0.01 |               |     | 0.9                          | 0.1 |         |      |         |      |               |     |
| 186     | 0.83  | 0.01 |               |     | 1.9                          | 0.1 |         |      |         |      |               |     |
| 224     | 0.88  | 0.01 |               |     | 2.1                          | 0.1 |         |      |         |      |               |     |

**Table S3i:** Side-chain model-free order parameters for apo-Gal3 from  $^2\text{H}$  relaxation rates.

| Residue | Atom | $O^2$ | std  | $\tau_e$ (ps) | std | $\tau_c$ (ns) | std |
|---------|------|-------|------|---------------|-----|---------------|-----|
| 114     | 1    | 0.51  | 0.02 | 44            | 2   |               |     |
| 114     | 2    | 0.48  | 0.01 | 30            | 1   |               |     |
| 115     | 1    | 0.22  | 0.00 | 27            | 0   |               |     |
| 115     | 2    | 0.44  | 0.01 | 50            | 1   |               |     |
| 116     | 1    | 0.46  | 0.01 | 77            | 1   |               |     |
| 120     | 1    | 0.63  | 0.03 | 33            | 2   |               |     |
| 126     | 2    | 0.77  | 0.05 | 81            | 5   |               |     |
| 126     | 1    | 0.78  | 0.03 | 70            | 3   |               |     |
| 127     | 1    | 0.25  | 0.01 | 87            | 1   |               |     |
| 130     | 1    | 0.48  | 0.01 | 6             | 0   |               |     |
| 131     | 1    | 0.51  | 0.01 | 32            | 1   |               |     |
| 132     | 1    | 0.38  | 0.01 | 14            | 1   |               |     |
| 132     | 2    | 0.67  | 0.02 | 31            | 1   |               |     |
| 134     | 1    | 0.82  | 0.02 | 27            | 2   |               |     |
| 135     | 2    | 0.38  | 0.01 | 38            | 1   |               |     |
| 137     | 2    | 0.55  | 0.01 | 66            | 1   |               |     |

|     |   |      |      |     |    |     |     |
|-----|---|------|------|-----|----|-----|-----|
| 138 | 1 | 1.00 | 0.10 | 139 | 12 |     |     |
| 138 | 2 | 0.90 | 0.03 | 27  | 2  |     |     |
| 142 | 1 | 0.92 | 0.05 | 68  | 4  |     |     |
| 145 | 1 | 0.77 | 0.02 | 16  | 2  |     |     |
| 145 | 2 | 0.78 | 0.02 | 33  | 2  |     |     |
| 146 | 1 | 0.83 | 0.01 | 43  | 1  |     |     |
| 147 | 1 | 0.52 | 0.08 | 61  | 5  | 4.2 | 0.8 |
| 147 | 2 | 0.28 | 0.01 | 70  | 2  |     |     |
| 170 | 1 | 0.41 | 0.02 | 72  | 2  |     |     |
| 170 | 2 | 0.49 | 0.01 | 70  | 1  |     |     |
| 171 | 2 | 0.85 | 0.02 | 27  | 2  |     |     |
| 172 | 2 | 0.87 | 0.03 | 23  | 2  |     |     |
| 172 | 1 | 0.82 | 0.05 | 61  | 4  |     |     |
| 175 | 2 | 0.96 | 0.04 | 29  | 3  |     |     |
| 189 | 2 | 0.79 | 0.05 | 32  | 3  | 5.9 | 0.4 |
| 200 | 1 | 0.78 | 0.02 | 14  | 1  |     |     |
| 200 | 2 | 0.80 | 0.02 | 24  | 2  |     |     |
| 202 | 2 | 0.69 | 0.06 | 44  | 5  |     |     |
| 202 | 1 | 0.52 | 0.01 | 29  | 1  |     |     |
| 203 | 2 | 0.62 | 0.02 | 38  | 2  |     |     |
| 204 | 1 | 0.88 | 0.03 | 35  | 2  |     |     |
| 204 | 2 | 0.91 | 0.03 | 19  | 2  |     |     |
| 211 | 1 | 0.85 | 0.02 | 37  | 2  |     |     |
| 212 | 1 | 0.97 | 0.03 | 39  | 2  |     |     |
| 213 | 1 | 0.94 | 0.05 | 67  | 4  |     |     |
| 216 | 1 | 0.91 | 0.02 | 36  | 2  |     |     |
| 218 | 1 | 0.74 | 0.06 | 55  | 6  |     |     |
| 225 | 1 | 0.76 | 0.02 | 51  | 2  |     |     |
| 225 | 2 | 0.76 | 0.02 | 45  | 1  |     |     |

|     |   |      |      |    |   |     |     |
|-----|---|------|------|----|---|-----|-----|
| 228 | 2 | 0.62 | 0.03 | 56 | 3 |     |     |
| 228 | 1 | 0.61 | 0.03 | 65 | 3 |     |     |
| 231 | 1 | 0.71 | 0.02 | 24 | 1 |     |     |
| 231 | 2 | 0.89 | 0.03 | 17 | 2 |     |     |
| 234 | 1 | 0.71 | 0.04 | 21 | 3 |     |     |
| 234 | 2 | 0.68 | 0.06 | 40 | 5 |     |     |
| 236 | 2 | 0.82 | 0.02 | 23 | 2 |     |     |
| 240 | 1 | 0.57 | 0.01 | 17 | 1 |     |     |
| 242 | 1 | 0.42 | 0.04 | 32 | 4 |     |     |
| 243 | 2 | 0.68 | 0.04 | 46 | 2 | 5.3 | 0.4 |
| 245 | 1 | 0.68 | 0.03 | 84 | 4 |     |     |
| 248 | 2 | 0.62 | 0.02 | 56 | 2 |     |     |
| 249 | 1 | 0.45 | 0.01 | 13 | 0 |     |     |
| 250 | 1 | 0.38 | 0.01 | 17 | 0 |     |     |
| 250 | 2 | 0.55 | 0.01 | 39 | 1 |     |     |

**Table S3j:** Side-chain model-free order parameters for lac-Gal3 from  $^2\text{H}$  relaxation rates.

| Residue | Atom | $O^2$ | std  | $\tau_e$ (ps) | std | $\tau_c$ (ns) | std |
|---------|------|-------|------|---------------|-----|---------------|-----|
| 113     | 2    | 0.02  | 0.00 | 9             | 0   |               |     |
| 114     | 1    | 0.45  | 0.02 | 46            | 2   |               |     |
| 114     | 2    | 0.42  | 0.01 | 35            | 1   |               |     |
| 115     | 1    | 0.20  | 0.00 | 27            | 1   |               |     |
| 115     | 2    | 0.40  | 0.01 | 51            | 1   |               |     |
| 116     | 2    | 0.44  | 0.01 | 80            | 2   |               |     |
| 120     | 1    | 0.63  | 0.03 | 38            | 3   |               |     |
| 126     | 2    | 0.66  | 0.04 | 95            | 6   |               |     |
| 126     | 1    | 0.66  | 0.03 | 74            | 4   |               |     |
| 127     | 2    | 0.24  | 0.01 | 87            | 2   |               |     |
| 130     | 1    | 0.44  | 0.01 | 5             | 1   |               |     |



|     |   |      |      |     |    |     |     |
|-----|---|------|------|-----|----|-----|-----|
| 131 | 1 | 0.48 | 0.01 | 33  | 1  |     |     |
| 132 | 1 | 0.34 | 0.01 | 15  | 1  |     |     |
| 132 | 2 | 0.65 | 0.01 | 33  | 2  |     |     |
| 134 | 1 | 0.77 | 0.08 | 27  | 4  | 7.7 | 0.9 |
| 135 | 2 | 0.35 | 0.01 | 40  | 1  |     |     |
| 137 | 2 | 0.51 | 0.01 | 67  | 2  |     |     |
| 138 | 1 | 0.75 | 0.10 | 179 | 19 |     |     |
| 138 | 2 | 0.83 | 0.03 | 34  | 3  |     |     |
| 142 | 1 | 0.87 | 0.05 | 74  | 6  |     |     |
| 145 | 1 | 0.73 | 0.02 | 17  | 2  |     |     |
| 145 | 2 | 0.72 | 0.02 | 32  | 2  |     |     |
| 146 | 1 | 0.77 | 0.01 | 46  | 1  |     |     |
| 147 | 1 | 0.27 | 0.01 | 75  | 2  |     |     |
| 147 | 2 | 0.28 | 0.01 | 71  | 2  |     |     |
| 156 | 1 | 0.87 | 0.06 | 97  | 9  |     |     |
| 170 | 1 | 0.36 | 0.01 | 74  | 2  |     |     |
| 170 | 2 | 0.45 | 0.01 | 78  | 2  |     |     |
| 171 | 2 | 0.76 | 0.02 | 28  | 2  |     |     |
| 172 | 1 | 0.80 | 0.02 | 24  | 3  |     |     |
| 172 | 2 | 0.74 | 0.03 | 62  | 4  |     |     |
| 175 | 2 | 0.90 | 0.04 | 28  | 4  |     |     |
| 189 | 2 | 0.58 | 0.01 | 41  | 1  |     |     |
| 200 | 1 | 0.71 | 0.02 | 15  | 2  |     |     |
| 200 | 2 | 0.77 | 0.02 | 25  | 2  |     |     |
| 202 | 1 | 0.54 | 0.05 | 54  | 7  |     |     |
| 202 | 2 | 0.51 | 0.01 | 30  | 2  |     |     |
| 203 | 2 | 0.65 | 0.11 | 36  | 6  | 6.9 | 1.5 |
| 204 | 1 | 0.83 | 0.03 | 38  | 3  |     |     |
| 204 | 2 | 0.83 | 0.02 | 23  | 2  |     |     |

|     |   |      |      |     |    |     |     |
|-----|---|------|------|-----|----|-----|-----|
| 211 | 1 | 0.82 | 0.02 | 39  | 2  |     |     |
| 212 | 1 | 0.86 | 0.03 | 40  | 3  |     |     |
| 213 | 1 | 0.82 | 0.04 | 70  | 5  |     |     |
| 216 | 1 | 0.87 | 0.02 | 37  | 2  |     |     |
| 218 | 1 | 0.69 | 0.05 | 54  | 7  |     |     |
| 219 | 2 | 0.71 | 0.09 | 100 | 14 |     |     |
| 225 | 1 | 0.70 | 0.02 | 53  | 3  |     |     |
| 225 | 2 | 0.71 | 0.02 | 44  | 2  |     |     |
| 228 | 2 | 0.63 | 0.03 | 54  | 4  |     |     |
| 228 | 1 | 0.56 | 0.02 | 65  | 4  |     |     |
| 231 | 1 | 0.87 | 0.07 | 13  | 5  | 5.9 | 0.5 |
| 231 | 2 | 0.84 | 0.03 | 21  | 2  |     |     |
| 234 | 1 | 0.65 | 0.03 | 18  | 4  |     |     |
| 234 | 2 | 0.63 | 0.06 | 45  | 7  |     |     |
| 236 | 1 | 0.52 | 0.01 | 15  | 2  |     |     |
| 236 | 2 | 0.78 | 0.02 | 21  | 2  |     |     |
| 240 | 1 | 0.55 | 0.01 | 16  | 1  |     |     |
| 242 | 2 | 0.65 | 0.03 | 33  | 4  |     |     |
| 242 | 1 | 0.45 | 0.05 | 35  | 6  |     |     |
| 243 | 2 | 0.45 | 0.01 | 57  | 1  |     |     |
| 245 | 1 | 0.72 | 0.03 | 82  | 5  |     |     |
| 248 | 2 | 0.55 | 0.02 | 58  | 2  |     |     |
| 249 | 1 | 0.43 | 0.01 | 13  | 1  |     |     |
| 250 | 1 | 0.35 | 0.00 | 18  | 1  |     |     |
| 250 | 2 | 0.51 | 0.01 | 40  | 1  |     |     |

**Table S3k:** Side-chain model-free order parameters for L2-Gal3 from  $^2\text{H}$  relaxation rates.

| Residue | Atom | $O^2$ | std  | $\tau_e$ (ps) | std | $\tau_c$ (ns) | std |
|---------|------|-------|------|---------------|-----|---------------|-----|
| 113     | 2    | 0.01  | 0.00 | 8             | 0   |               |     |
| 114     | 1    | 0.47  | 0.01 | 46            | 1   |               |     |
| 114     | 2    | 0.42  | 0.01 | 32            | 1   |               |     |
| 115     | 1    | 0.21  | 0.00 | 26            | 0   |               |     |
| 115     | 2    | 0.40  | 0.01 | 52            | 1   |               |     |
| 116     | 1    | 0.44  | 0.01 | 85            | 2   |               |     |
| 120     | 1    | 0.57  | 0.02 | 36            | 2   |               |     |
| 126     | 2    | 0.67  | 0.03 | 87            | 4   |               |     |
| 126     | 1    | 0.69  | 0.02 | 79            | 2   |               |     |
| 127     | 2    | 0.26  | 0.01 | 85            | 1   |               |     |
| 130     | 1    | 0.50  | 0.02 | 4             | 1   | 6.8           | 0.3 |
| 131     | 1    | 0.49  | 0.01 | 31            | 1   |               |     |
| 132     | 1    | 0.39  | 0.01 | 13            | 1   |               |     |
| 132     | 2    | 0.65  | 0.02 | 33            | 1   |               |     |
| 134     | 1    | 0.83  | 0.07 | 24            | 3   | 7.1           | 0.6 |
| 135     | 2    | 0.32  | 0.00 | 40            | 1   |               |     |
| 137     | 2    | 0.49  | 0.01 | 64            | 1   |               |     |
| 138     | 2    | 0.82  | 0.02 | 30            | 2   |               |     |
| 142     | 1    | 0.83  | 0.03 | 66            | 3   |               |     |
| 145     | 1    | 0.73  | 0.02 | 15            | 2   |               |     |
| 145     | 2    | 0.70  | 0.02 | 33            | 2   |               |     |
| 146     | 1    | 0.81  | 0.02 | 30            | 2   |               |     |
| 147     | 1    | 0.29  | 0.01 | 72            | 2   |               |     |
| 147     | 2    | 0.55  | 0.08 | 56            | 5   | 4.0           | 0.6 |
| 155     | 2    | 0.82  | 0.04 | 79            | 4   |               |     |
| 156     | 1    | 0.82  | 0.05 | 90            | 6   |               |     |
| 170     | 1    | 0.41  | 0.02 | 68            | 2   |               |     |

|     |   |      |      |    |   |     |     |
|-----|---|------|------|----|---|-----|-----|
| 171 | 2 | 0.77 | 0.02 | 22 | 2 |     |     |
| 172 | 1 | 0.82 | 0.03 | 23 | 2 |     |     |
| 172 | 2 | 0.72 | 0.03 | 58 | 3 |     |     |
| 189 | 2 | 0.73 | 0.04 | 34 | 2 | 6.0 | 0.4 |
| 200 | 1 | 0.67 | 0.01 | 15 | 1 |     |     |
| 200 | 2 | 0.77 | 0.01 | 24 | 1 |     |     |
| 202 | 2 | 0.55 | 0.01 | 26 | 1 |     |     |
| 203 | 2 | 0.56 | 0.02 | 41 | 2 |     |     |
| 204 | 1 | 0.82 | 0.02 | 38 | 1 |     |     |
| 204 | 2 | 0.82 | 0.02 | 20 | 2 |     |     |
| 211 | 1 | 0.78 | 0.02 | 40 | 1 |     |     |
| 212 | 1 | 0.88 | 0.02 | 41 | 2 |     |     |
| 213 | 1 | 0.84 | 0.03 | 69 | 3 |     |     |
| 216 | 1 | 0.88 | 0.02 | 36 | 1 |     |     |
| 218 | 1 | 0.70 | 0.04 | 61 | 5 |     |     |
| 219 | 2 | 0.75 | 0.06 | 77 | 7 |     |     |
| 225 | 2 | 0.71 | 0.01 | 47 | 1 |     |     |
| 228 | 2 | 0.62 | 0.02 | 55 | 3 |     |     |
| 228 | 1 | 0.53 | 0.02 | 75 | 3 |     |     |
| 231 | 1 | 0.63 | 0.01 | 26 | 1 |     |     |
| 231 | 2 | 0.80 | 0.02 | 20 | 2 |     |     |
| 234 | 1 | 0.68 | 0.03 | 12 | 3 |     |     |
| 236 | 1 | 0.53 | 0.01 | 15 | 1 |     |     |
| 236 | 2 | 0.80 | 0.02 | 24 | 1 |     |     |
| 240 | 1 | 0.55 | 0.01 | 16 | 1 |     |     |
| 240 | 2 | 0.63 | 0.01 | 43 | 1 |     |     |
| 242 | 2 | 0.61 | 0.03 | 35 | 3 |     |     |
| 242 | 1 | 0.69 | 0.07 | 56 | 7 |     |     |
| 243 | 2 | 0.46 | 0.01 | 55 | 1 |     |     |

|     |   |      |      |    |   |     |     |
|-----|---|------|------|----|---|-----|-----|
| 245 | 1 | 0.73 | 0.03 | 97 | 4 |     |     |
| 248 | 2 | 0.55 | 0.01 | 57 | 1 |     |     |
| 249 | 1 | 0.43 | 0.00 | 11 | 0 |     |     |
| 250 | 1 | 0.48 | 0.02 | 10 | 1 | 5.5 | 0.3 |
| 250 | 2 | 0.50 | 0.01 | 40 | 1 |     |     |

**Table S31:** Side-chain model-free order parameters for L3-Gal3 from  $^2\text{H}$  relaxation rates.

| Residue | Atom | $O^2$ | std  | $\tau_e$ (ps) | std | $\tau_c$ (ns) | std |
|---------|------|-------|------|---------------|-----|---------------|-----|
| 113     | 2    | 0.01  | 0.00 | 9             | 0   |               |     |
| 114     | 1    | 0.51  | 0.01 | 45            | 1   |               |     |
| 114     | 2    | 0.47  | 0.01 | 30            | 1   |               |     |
| 115     | 1    | 0.21  | 0.00 | 26            | 0   |               |     |
| 115     | 2    | 0.44  | 0.01 | 49            | 1   |               |     |
| 116     | 1    | 0.53  | 0.02 | 96            | 2   |               |     |
| 120     | 1    | 0.56  | 0.02 | 36            | 2   |               |     |
| 126     | 2    | 0.75  | 0.03 | 86            | 4   |               |     |
| 126     | 1    | 0.63  | 0.02 | 73            | 3   |               |     |
| 127     | 2    | 0.25  | 0.01 | 87            | 1   |               |     |
| 130     | 1    | 0.47  | 0.00 | 4             | 0   |               |     |
| 131     | 1    | 0.54  | 0.01 | 30            | 1   |               |     |
| 132     | 1    | 0.43  | 0.03 | 9             | 2   | 6.4           | 0.5 |
| 132     | 2    | 0.73  | 0.02 | 27            | 2   |               |     |
| 134     | 1    | 0.78  | 0.02 | 26            | 1   |               |     |
| 135     | 2    | 0.35  | 0.01 | 40            | 1   |               |     |
| 137     | 2    | 0.55  | 0.01 | 59            | 1   |               |     |
| 138     | 2    | 0.87  | 0.03 | 28            | 2   |               |     |
| 142     | 1    | 0.84  | 0.04 | 73            | 4   |               |     |
| 145     | 1    | 0.75  | 0.02 | 17            | 2   |               |     |
| 145     | 2    | 0.74  | 0.02 | 32            | 2   |               |     |

|     |   |      |      |    |   |     |     |
|-----|---|------|------|----|---|-----|-----|
| 146 | 1 | 0.91 | 0.02 | 40 | 2 |     |     |
| 147 | 1 | 0.26 | 0.01 | 72 | 2 |     |     |
| 147 | 2 | 0.27 | 0.01 | 70 | 2 |     |     |
| 155 | 2 | 0.79 | 0.04 | 93 | 4 |     |     |
| 156 | 1 | 0.98 | 0.06 | 78 | 5 |     |     |
| 170 | 1 | 0.57 | 0.08 | 63 | 4 | 5.3 | 0.8 |
| 170 | 2 | 0.54 | 0.01 | 73 | 1 |     |     |
| 171 | 2 | 0.82 | 0.02 | 27 | 2 |     |     |
| 172 | 2 | 0.65 | 0.04 | 67 | 5 |     |     |
| 189 | 2 | 0.64 | 0.01 | 36 | 1 |     |     |
| 200 | 1 | 0.73 | 0.01 | 12 | 1 |     |     |
| 200 | 2 | 0.77 | 0.02 | 24 | 1 |     |     |
| 202 | 1 | 0.75 | 0.05 | 41 | 6 |     |     |
| 202 | 2 | 0.58 | 0.01 | 27 | 1 |     |     |
| 203 | 2 | 0.57 | 0.02 | 42 | 2 |     |     |
| 204 | 1 | 0.89 | 0.02 | 32 | 2 |     |     |
| 204 | 2 | 0.83 | 0.02 | 23 | 2 |     |     |
| 211 | 1 | 0.83 | 0.02 | 33 | 2 |     |     |
| 212 | 1 | 0.90 | 0.02 | 43 | 2 |     |     |
| 213 | 1 | 0.84 | 0.03 | 72 | 3 |     |     |
| 216 | 1 | 0.88 | 0.02 | 39 | 2 |     |     |
| 218 | 1 | 0.83 | 0.06 | 46 | 5 |     |     |
| 219 | 2 | 0.81 | 0.08 | 71 | 9 |     |     |
| 228 | 2 | 0.62 | 0.03 | 60 | 3 |     |     |
| 228 | 1 | 0.65 | 0.02 | 63 | 3 |     |     |
| 231 | 1 | 0.65 | 0.01 | 21 | 1 |     |     |
| 231 | 2 | 0.84 | 0.02 | 18 | 2 |     |     |
| 234 | 1 | 0.72 | 0.03 | 23 | 3 |     |     |
| 234 | 2 | 0.69 | 0.05 | 31 | 5 |     |     |

|     |   |      |      |    |   |     |     |
|-----|---|------|------|----|---|-----|-----|
| 236 | 1 | 0.64 | 0.05 | 8  | 3 | 6.5 | 0.5 |
| 236 | 2 | 0.83 | 0.02 | 20 | 2 |     |     |
| 240 | 1 | 0.54 | 0.01 | 17 | 1 |     |     |
| 242 | 1 | 0.88 | 0.08 | 38 | 7 |     |     |
| 245 | 1 | 0.98 | 0.03 | 73 | 3 |     |     |
| 248 | 2 | 0.59 | 0.01 | 54 | 1 |     |     |
| 249 | 1 | 0.45 | 0.00 | 11 | 0 |     |     |
| 250 | 1 | 0.38 | 0.00 | 16 | 1 |     |     |
| 250 | 2 | 0.56 | 0.01 | 38 | 1 |     |     |

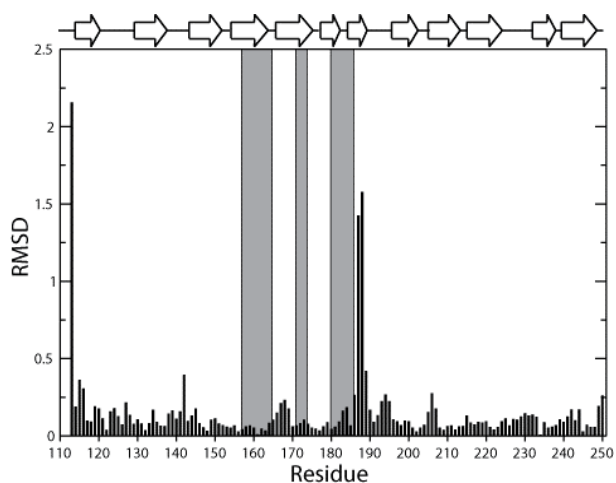

**Figure S1a:** Atom coordinate RMSD between each lactose-bound state and the apo state, plotted versus residue number. Secondary structure elements are indicated at the top of the graph. Residues within 5 Å of the ligand are highlighted by grey bars.

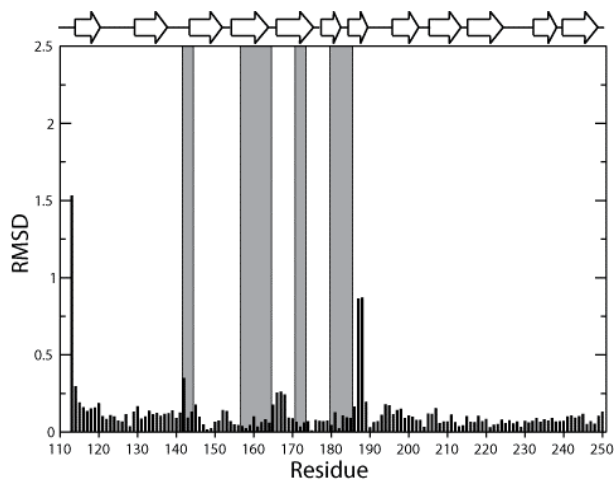

**Figure S1b:** Atom coordinate RMSD between each L2-bound state and the apo state, plotted versus residue number. Secondary structure elements are indicated at the top of the graph. Residues within 5 Å of the ligand are highlighted by grey bars.



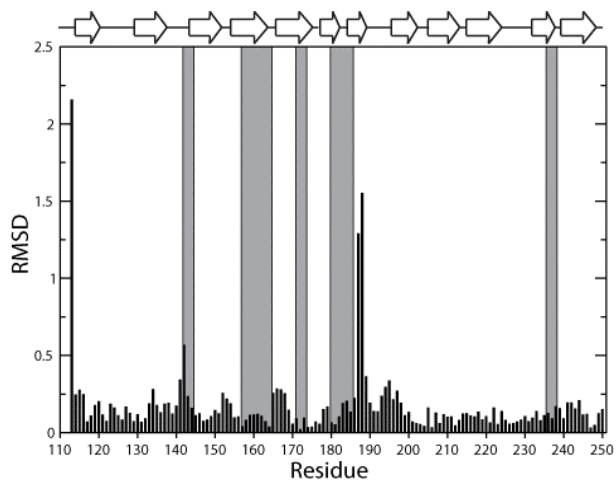

**Figure S1c:** Atom coordinate RMSD between each L2-bound state and the apo state, plotted versus residue number. Secondary structure elements are indicated at the top of the graph. Residues within 5 Å of the ligand are highlighted by grey bars.

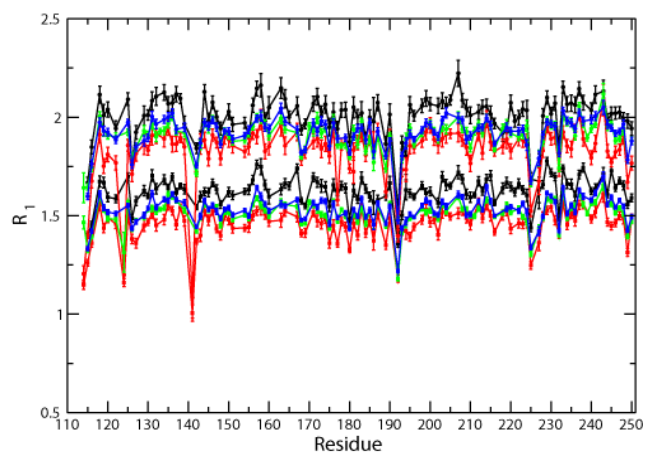

**Figure S2a:**  $^{15}\text{N}$   $R_1$  relaxation rates for all backbone amides at 500 (circles) and 600 MHz (squares). (black) apo Gal3, (red) lac-Gal3, (green) L2-Gal3, and (blue) L3-Gal3.

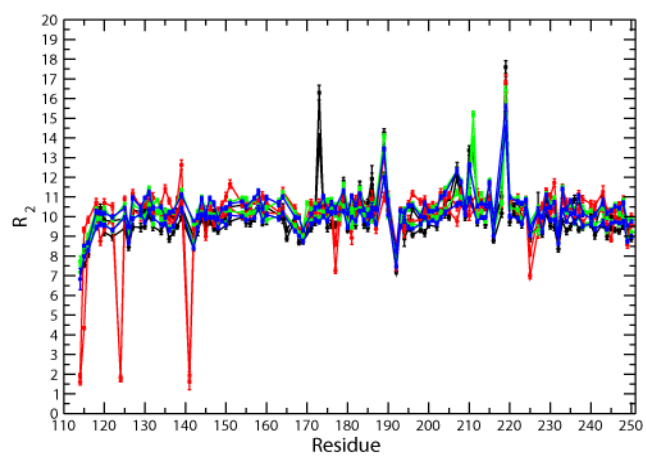

**Figure S2b:**  $^{15}\text{N}$   $R_2$  relaxation rates for all backbone amides at 500 (circles) and 600 MHz (squares). (black) apo Gal3, (red) lac-Gal3, (green) L2-Gal3, and (blue) L3-Gal3.

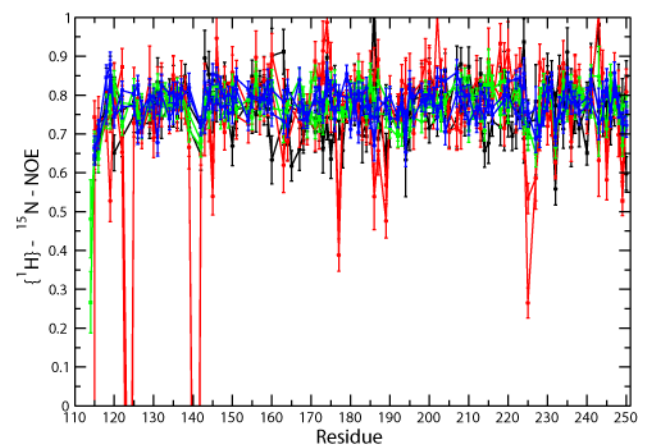

**Figure S2c:**  $\{^1\text{H}\}-^{15}\text{N}$  NOE for all backbone amides at 500 (circles) and 600 MHz (squares). (black) apo Gal3, (red) lac-Gal3, (green) L2-Gal3, and (blue) L3-Gal3.

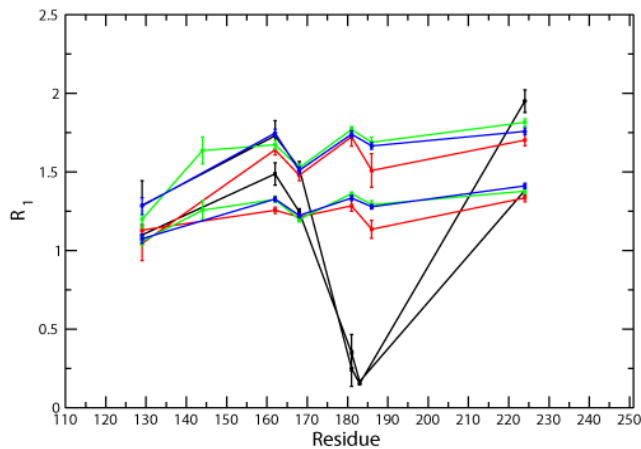

**Figure S2d:**  $^{15}\text{N}$   $R_1$  relaxation rates for all sidechain arginines and tryptophanes at 500 (circles) and 600 MHz (squares). (black) apo Gal3, (red) lac-Gal3, (green) L2-Gal3, and (blue) L3-Gal3.

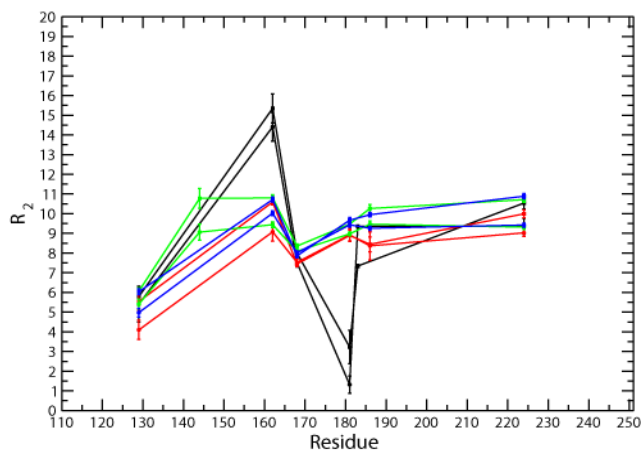

**Figure S2d:**  $^{15}\text{N}$   $R_2$  relaxation rates for all sidechain arginines and tryptophanes at 500 (circles) and 600 MHz (squares). (black) apo Gal3, (red) lac-Gal3, (green) L2-Gal3, and (blue) L3-Gal3.

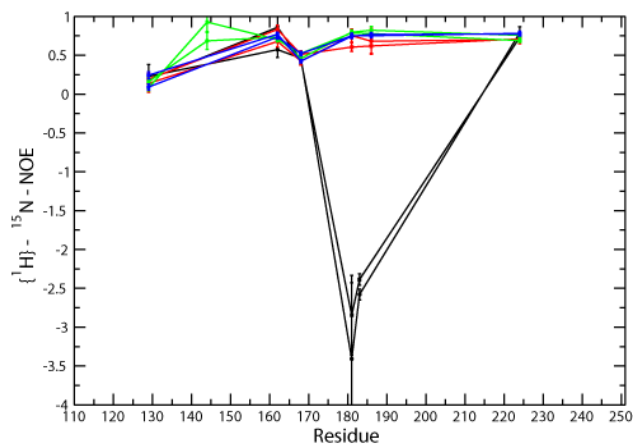

**Figure S2e:**  $\{^1\text{H}\}-^{15}\text{N}$  NOE for all sidechain arginines and tryptophanes at 500 (circles) and 600 MHz (squares). (black) apo Gal3, (red) lac-Gal3, (green) L2-Gal3, and (blue) L3-Gal3.

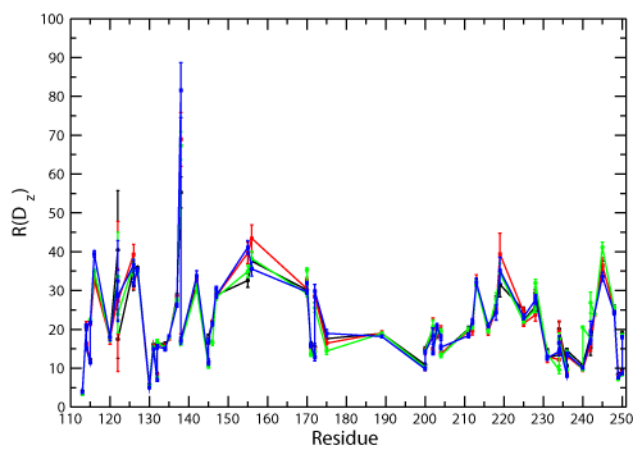

**Figure S2f:**  $R(D_z)$  relaxation rates for methyl groups at 600 MHz. (black) apo Gal3, (red) lac-Gal3, (green) L2-Gal3, and (blue) L3-Gal3.

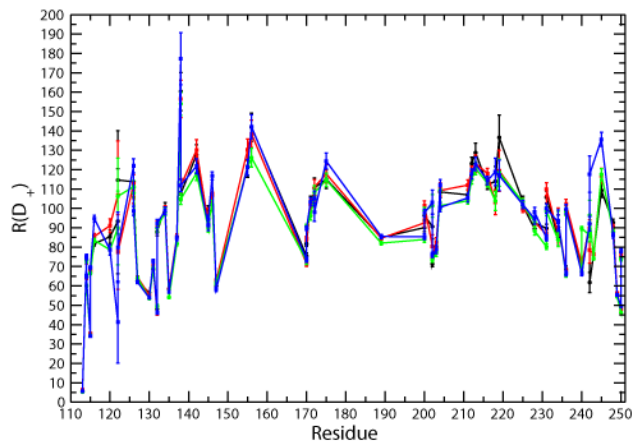

**Figure S2g:**  $R(D_+)$  relaxation rates for methyl groups at 600 MHz. (black) apo Gal3, (red) lac-Gal3, (green) L2-Gal3, and (blue) L3-Gal3.

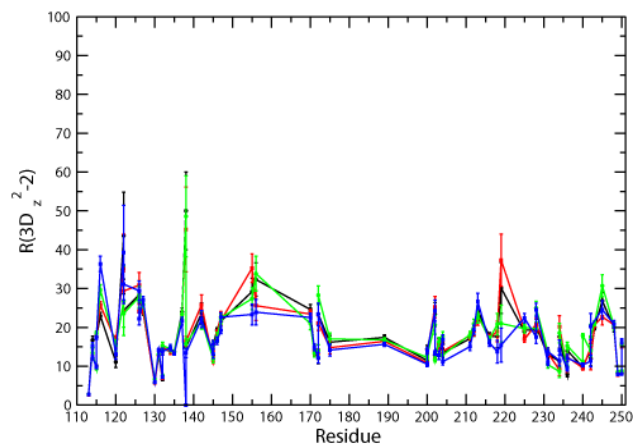

**Figure S2h:**  $R(3D_z - 2)$  relaxation rates for methyl groups at 600 MHz. (black) apo Gal3, (red) lac-

Gal3, (green) L2-Gal3, and (blue) L3-Gal3.

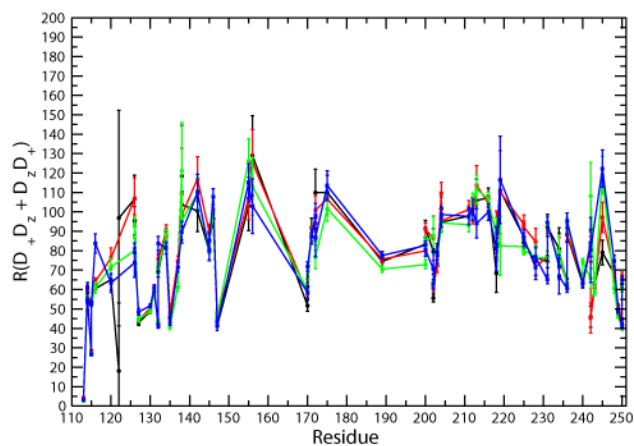

**Figure S2i:**  $R(D_+D_z + D_zD_+)$  relaxation rates for methyl groups at 600 MHz. (black) apo Gal3, (red) lac-Gal3, (green) L2-Gal3, and (blue) L3-Gal3.

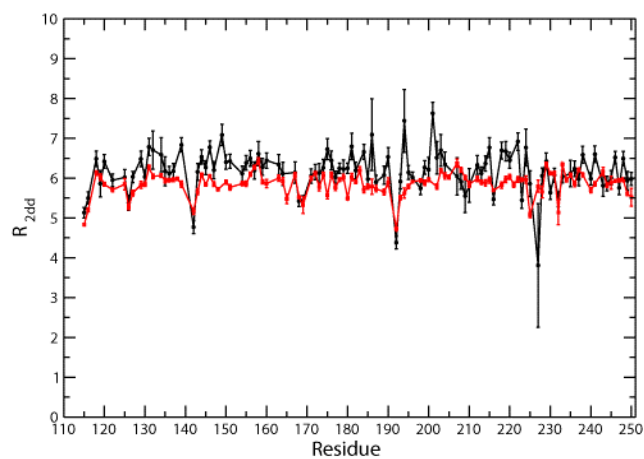

**Figure S3:**  $^{15}\text{N}$   $R_{2\text{dd}}$  relaxation rates for backbone amides in apo-Gal3 at 500 MHz. (black) experimental rates, and (red) theoretical rates calculated from model-free parameters.
